# Supplementary material for: Multiple hazards and risk perceptions over time: the availability heuristic in Italy and Sweden under COVID-19
Source: Copernicus journal article supplement (doi:10.5194/nhess-21-3439-2021), 2021-11-12
Supplement: Supplementary file 1 [file nhess-21-3439-2021-supplement.pdf]

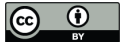

*Supplement of*

**Multiple hazards and risk perceptions over time: the availability heuristic in Italy and Sweden under COVID-19**

**Giuliano Di Baldassarre et al.**

*Correspondence to:* Giuliano Di Baldassarre ([giuliano.dibaldassarre@geo.uu.se](mailto:giuliano.dibaldassarre@geo.uu.se))

The copyright of individual parts of the supplement might differ from the article licence.

1

# Supplementary Material

2 This Supplementary Material further analyses the results of the two surveys in Italy and  
 3 Sweden in terms of gender, age and political orientation in order to explore their role in the  
 4 explaining public perceptions of multiple hazards. Figures S1-S3 shows that women,  
 5 youngsters and people with a left political orientation are generally more concerned about  
 6 multiple hazards than men, elderly and people with a right political orientation.

7 Despite these differences in the absolute values of perceived likelihood and impact, the way in  
 8 which multiple hazards are ranked remain similar across socio-demographic factors. Relative  
 9 rankings are primarily driven by experience. We interpret this outcome by the major role played  
 10 by the availability heuristic in explaining cross-country differences in terms of public risk  
 11 perception.

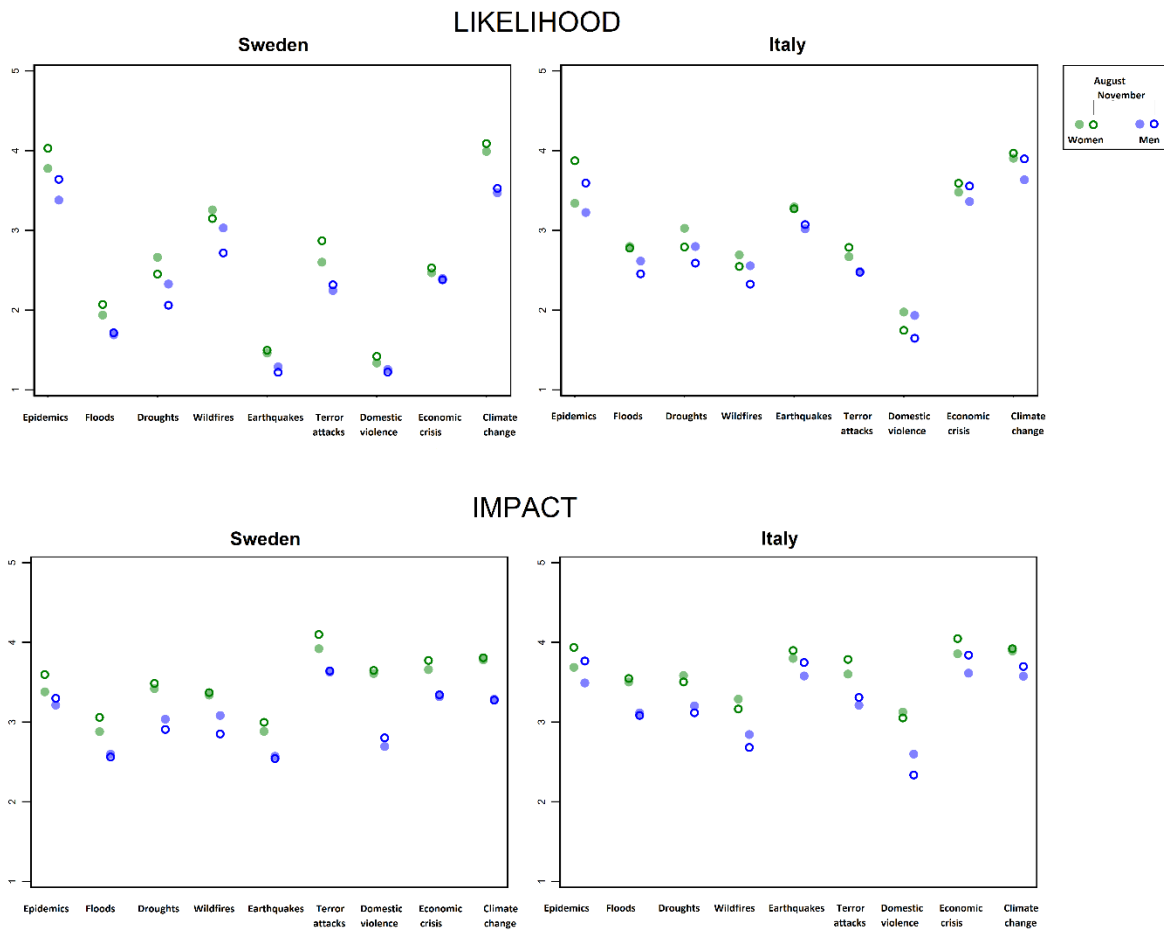

12

13 **Figure S1.** Perceived likelihood and impact in Italy and Sweden in August and November  
 14 2020 by gender.

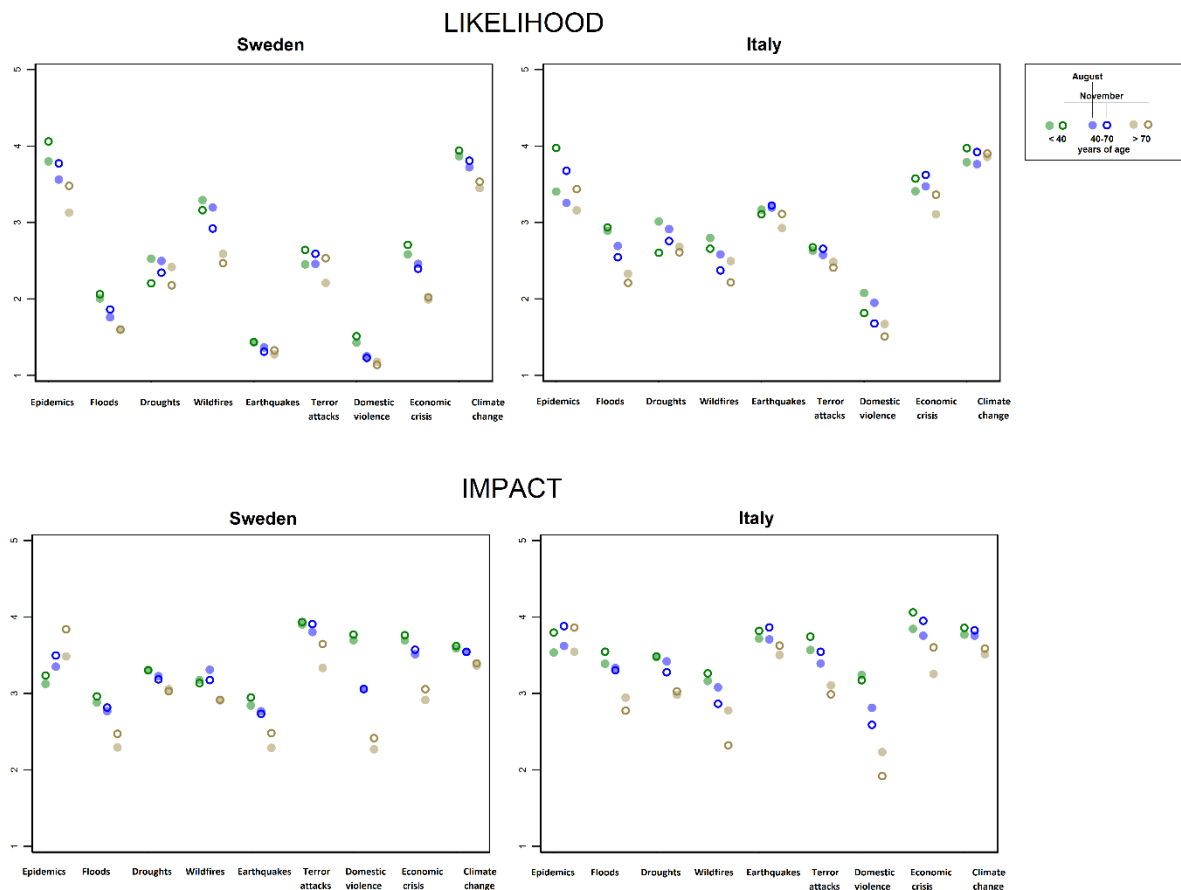

15

16 **Figure S2.** Perceived likelihood and impact in Italy and Sweden in August and November  
 17 2020 by age groups.

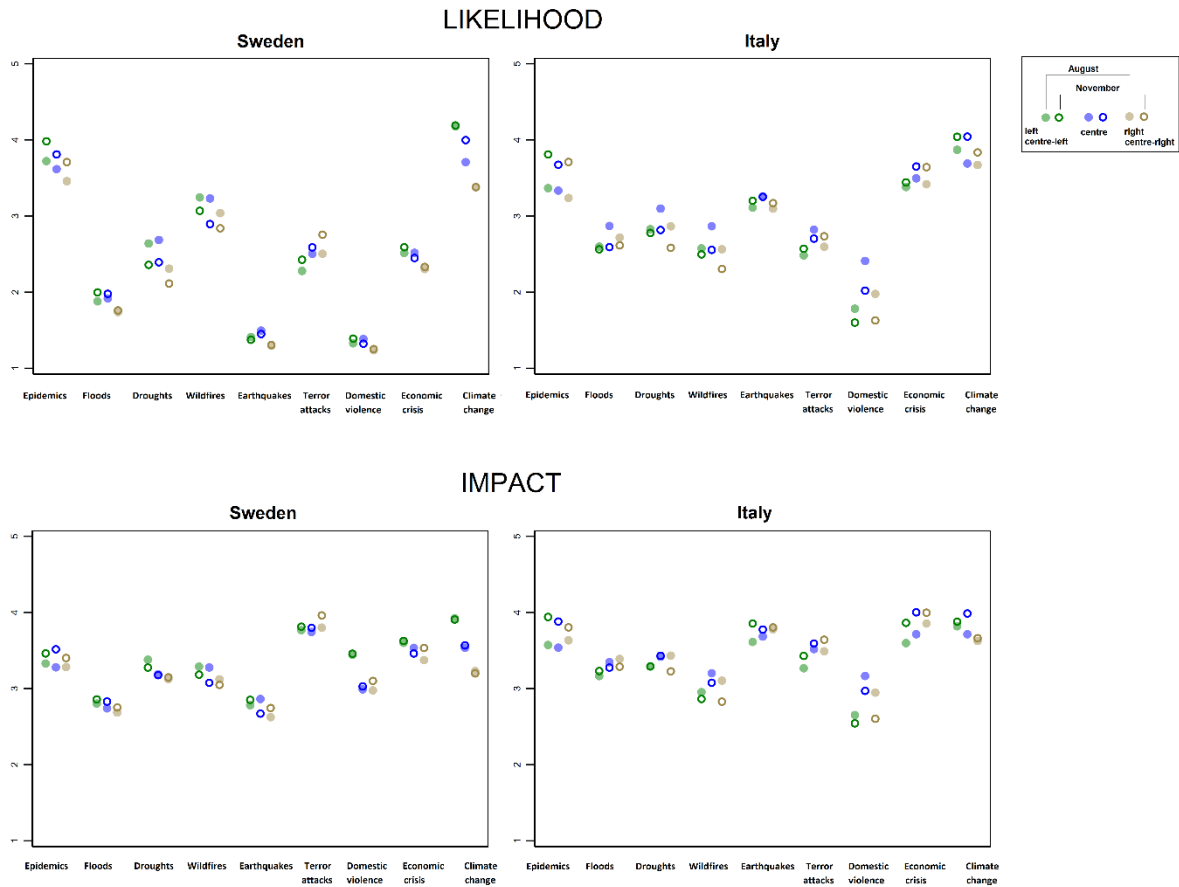

18

19 **Figure S3.** Perceived likelihood and impact in Italy and Sweden in August and November  
 20 2020 by political orientation.
